# Supplementary material
Source: Research Square preprint supplement (doi:10.21203/rs.3.rs-9254228/v1)
Supplement: Supplementary file 1 [file 17076ea7bfcf37b2fb088315.xlsx]

## Sheet: Sheet1
Target	Forward	Reverse	Accession ID	GB number	Source
Vg	GTT GGA GAG CAA CAT GCA GA	TCG ATC CAT TCC TTG ATG GT	NM_001011578.1	GB13999, GB49544	Amdam 2004
Cat	TCC ACT CAT TCC TGT TGG TAA G	GCC GGA TCG AAG GCT ATT T	NP_001171540.1	GB11648, GB41427	Gregorc et al 2018
CYP9Q2	GAT TAT CGC CTA TTA TTA CTG	GTT CTC CTT CCC TCT GAT	XM_392000.7		Mao et al., 2011
CYP9Q3	GTA GCC ATT CAC GCG TTC AC	GTC TCG TCG ATC TCC TGC TG	XM_006562300.1		Smet et al 2017
rp49	GGG ACA ATA TTT GAT GCC CAA T	CTT GAC ATT ATG TAC CAA AAC TTT TCT		GB10903, GB47227	Ament et al 2011
GapDH	ACT GGT ATG GCC TTC CGT GTA C	TGC CAA GTC TAA CTG TTA AGT CAA CA		GB50902, GB14798	Robinson Lab
RPS5	AAT TAT TTG GTC GCT GGA ATT G	TAA CGT CCA GCA GAA TGT GGT A	XM_006570237.2		Evans 2006
